# Supplementary material
Source: MDPI journal article supplement (https://www.mdpi.com/search?q=forests-09-00408)
Supplement: s001 [file forests-09-00408-s001.pdf]

## Supplement 1

### The Shapiro-Wilk test

The Shapiro-Wilk tests the null hypothesis that a sample  $x_1, \dots, x_n$  came from a normally distributed population. The test statistic is

$$W = \frac{(\sum_{i=1}^n a_i x_{(i)})^2}{\sum_{i=1}^n (x_i - \bar{x})^2}$$

where

$x_{(i)}$  (with parentheses enclosing the subscript index  $i$ ; not to be confused with  $x_i$ ) is the  $i$ th order statistic, i.e., the  $i$ th-smallest number in the sample;

$\bar{x} = (x_1 + \dots + x_n) / n$  is the sample mean;

The constants  $a_i$  are given by

$$(a_1, \dots, a_n) = \frac{m^T V^{-1}}{(m^T V^{-1} V^{-1} m)^{1/2}} \quad [1]$$

Where

$$m = (m_1, \dots, m_n)^T$$

and  $m_1, \dots, m_n$  are the expected values of the order statistics of independent and identically distributed random variables sampled from the standard normal distribution, and  $V$  is the covariance matrix of those order statistics.

### Levene's homoscedasticity test

In statistics, Levene's test is an inferential statistic used to assess the equality of variances for a variable calculated for two or more groups [2].

The test statistic,  $W$ , is defined as follows:

$$W = \frac{(N - K) \sum_{i=1}^k N_i (Z_i - Z_{..})^2}{(k - 1) \sum_{i=1}^k \sum_{j=1}^{N_i} (Z_{ij} - Z_i)^2}$$

where

$k$  is the number of different groups to which the sampled cases belong,

$N_i$  is the number of cases in the  $i$ th group,

$N$  is the total number of cases in all groups,

$Y_{ij}$  is the value of the measured variable for the  $j$ th case from the  $i$ th group,

$$Z_{ij} = \begin{cases} |Y_{ij} - \bar{Y}_i|, & Y_i \text{ is a mean of the } i\text{-th group,} \\ |Y_{ij} - \tilde{Y}_i|, & \tilde{Y}_i \text{ is a median of the } i\text{-th group,} \end{cases}$$

$$Z_i = \frac{1}{N_i} \sum_{j=1}^{N_i} Z_{ij} \text{ is the mean of the } Z_{ij} \text{ for group } i,$$

$$Z_{..} = \frac{1}{N} \sum_{i=1}^k \sum_{j=1}^{N_i} Z_{ij} \text{ is the mean of all } Z_{ij}.$$

The test statistic  $W$  is approximately F-distributed with  $k - 1$  with  $N - k$  degrees of freedom, and hence is the significance of the outcome  $\alpha$  of  $W$  tested against  $F(\alpha, k - 1, N - k)$  where  $F$  is a quantile of the F-distribution, with  $k - 1$  and  $N - k$  degrees of freedom, and  $\alpha$  is the chosen level of significance (usually 0.05 or 0.01).

### Duncan's multiple range test

Assumptions:

1. A sample of observed means  $m_1, m_2, \dots, m_M$ , which have been drawn independently from  $n$  normal populations with "true" means,  $\mu, \mu_2, \dots, \mu_n$  respectively[3].
2. A common standard error  $\sigma$ . This standard error is unknown, but there is available the usual estimate  $s_m$ , which is independent of the observed means and is based on a number of degrees of freedom, denoted by  $n_2$ . (More precisely,  $s_m$  has the property that  $\frac{n_2 \cdot s_m^2}{\sigma_m^2}$  is distributed as  $\chi^2$  with  $n_2$  degrees of freedom, independently of sample means).

The exact definition of the test is:

The difference between any two means in a set of  $n$  means is significant provided the range of each and every subset which contains the given means is significant according to an  $\alpha_p$  level range test where  $\alpha_p = 1 - \gamma_p$ ,  $\gamma_p = (1 - \alpha)^{p-1}$  and  $p$  is the number of means in the subset concerned.

Exception: The sole exception to this rule is that no difference between two means can be declared significant if the two means concerned are both contained in a subset of the means which has a non-significant range.

1. Shapiro, S. S.; Wilk, M. B. An analysis of variance test for normality (complete samples). *Biometrika* **1965**, *52*, (3-4), 591-611. doi:10.1093/biomet/52.3-4.591.
2. Levene, H. *Robust tests for equality of variances*. In Ingram Olkin; Harold Hotelling; et al., 1960. *Contributions to Probability and Statistics: Essays in Honor of Harold Hotelling*. Stanford University Press. p 278-292.
3. Duncan, D. B. Multiple range and multiple F tests. *Biometrics* **1955**, *11*: 1-42. doi:10.2307/3001478.

## Supplement 2

| Site | Plot | Sub-plot | Depth | Dominant tree             | Fire severity | Slope position | Aspect | Bulk density (g/m <sup>3</sup> ) | BC concentration (mg/g) |
|------|------|----------|-------|---------------------------|---------------|----------------|--------|----------------------------------|-------------------------|
| 1    | 1    | 1        | 1     | <i>Larix gmelinii.</i>    | High          | Lower          | Shady  | 1.373                            | 0.5751                  |
| 1    | 1    | 1        | 2     | <i>Larix gmelinii.</i>    | High          | Lower          | Shady  | 1.301                            | 0.5169                  |
| 1    | 1    | 1        | 3     | <i>Larix gmelinii.</i>    | High          | Lower          | Shady  | 1.612                            | 0.6069                  |
| 1    | 1    | 1        | 4     | <i>Larix gmelinii.</i>    | High          | Lower          | Shady  | 1.547                            | 0.5448                  |
| 1    | 1    | 2        | 1     | <i>Larix gmelinii.</i>    | High          | Lower          | Shady  | 0.976                            | 0.5824                  |
| 1    | 1    | 2        | 2     | <i>Larix gmelinii.</i>    | High          | Lower          | Shady  | 1.179                            | 0.9821                  |
| 1    | 1    | 2        | 3     | <i>Larix gmelinii.</i>    | High          | Lower          | Shady  | 1.442                            | 3.0803                  |
| 1    | 1    | 2        | 4     | <i>Larix gmelinii.</i>    | High          | Lower          | Shady  | 1.662                            | 0.5540                  |
| 1    | 1    | 3        | 1     | <i>Larix gmelinii.</i>    | High          | Lower          | Shady  | 0.282                            | 1.6894                  |
| 1    | 1    | 3        | 2     | <i>Larix gmelinii.</i>    | High          | Lower          | Shady  | 1.11                             | 0.6483                  |
| 1    | 1    | 3        | 3     | <i>Larix gmelinii.</i>    | High          | Lower          | Shady  | 1.267                            | 0.7098                  |
| 1    | 1    | 3        | 4     | <i>Larix gmelinii.</i>    | High          | Lower          | Shady  | 1.457                            | 0.5329                  |
| 1    | 2    | 1        | 1     | <i>Larix gmelinii.</i>    | High          | Lower          | Shady  | 1.219                            | 0.6526                  |
| 1    | 2    | 1        | 2     | <i>Larix gmelinii.</i>    | High          | Lower          | Shady  | 1.294                            | 0.5955                  |
| 1    | 2    | 1        | 3     | <i>Larix gmelinii.</i>    | High          | Lower          | Shady  | 1.291                            | 0.6005                  |
| 1    | 2    | 1        | 4     | <i>Larix gmelinii.</i>    | High          | Lower          | Shady  | 1.333                            | 0.5894                  |
| 1    | 2    | 2        | 1     | <i>Larix gmelinii.</i>    | High          | Lower          | Shady  | 1.034                            | 0.8817                  |
| 1    | 2    | 2        | 2     | <i>Larix gmelinii.</i>    | High          | Lower          | Shady  | 1.126                            | 0.8143                  |
| 1    | 2    | 2        | 3     | <i>Larix gmelinii.</i>    | High          | Lower          | Shady  | 1.315                            | 0.8326                  |
| 1    | 2    | 2        | 4     | <i>Larix gmelinii.</i>    | High          | Lower          | Shady  | 1.342                            | 0.6963                  |
| 1    | 2    | 3        | 1     | <i>Larix gmelinii.</i>    | High          | Lower          | Shady  | 0.401                            | 1.7443                  |
| 1    | 2    | 3        | 2     | <i>Larix gmelinii.</i>    | High          | Lower          | Shady  | 0.724                            | 1.3473                  |
| 1    | 2    | 3        | 3     | <i>Larix gmelinii.</i>    | High          | Lower          | Shady  | 1.288                            | 0.5051                  |
| 1    | 3    | 1        | 1     | <i>Larix gmelinii.</i>    | High          | Lower          | Shady  | 0.467                            | 3.9506                  |
| 1    | 3    | 1        | 2     | <i>Larix gmelinii.</i>    | High          | Lower          | Shady  | 0.705                            | 2.0332                  |
| 1    | 3    | 1        | 3     | <i>Larix gmelinii.</i>    | High          | Lower          | Shady  | 1.277                            | 1.3428                  |
| 1    | 3    | 2        | 1     | <i>Larix gmelinii.</i>    | High          | Lower          | Shady  | 0.759                            | 1.7765                  |
| 1    | 3    | 2        | 2     | <i>Larix gmelinii.</i>    | High          | Lower          | Shady  | 1.462                            | 0.7286                  |
| 1    | 3    | 2        | 3     | <i>Larix gmelinii.</i>    | High          | Lower          | Shady  | 1.605                            | 0.6598                  |
| 1    | 3    | 2        | 4     | <i>Larix gmelinii.</i>    | High          | Lower          | Shady  | 1.39                             | 0.6361                  |
| 1    | 3    | 3        | 1     | <i>Larix gmelinii.</i>    | High          | Lower          | Shady  | 0.844                            | 1.0862                  |
| 1    | 3    | 3        | 2     | <i>Larix gmelinii.</i>    | High          | Lower          | Shady  | 0.92                             | 1.1832                  |
| 2    | 1    | 1        | 1     | <i>Betula platyphylla</i> | High          | Lower          | Shady  | 0.4                              | 3.7376                  |
| 2    | 1    | 1        | 2     | <i>Betula platyphylla</i> | High          | Lower          | Shady  | 1.135                            | 1.1586                  |
| 2    | 1    | 1        | 3     | <i>Betula platyphylla</i> | High          | Lower          | Shady  | 1.443                            | 0.8233                  |
| 2    | 1    | 1        | 4     | <i>Betula platyphylla</i> | High          | Lower          | Shady  | 1.405                            | 0.8638                  |
| 2    | 1    | 2        | 1     | <i>Betula platyphylla</i> | High          | Lower          | Shady  | 0.173                            | 9.1583                  |
| 2    | 1    | 2        | 2     | <i>Betula platyphylla</i> | High          | Lower          | Shady  | 0.608                            | 2.7330                  |
| 2    | 1    | 2        | 3     | <i>Betula platyphylla</i> | High          | Lower          | Shady  | 0.862                            | 1.3425                  |
| 2    | 1    | 3        | 1     | <i>Betula platyphylla</i> | High          | Lower          | Shady  | 0.45                             | 4.4097                  |
| 2    | 1    | 3        | 2     | <i>Betula platyphylla</i> | High          | Lower          | Shady  | 0.544                            | 5.3183                  |
| 2    | 1    | 3        | 3     | <i>Betula platyphylla</i> | High          | Lower          | Shady  | 0.643                            | 1.8334                  |
| 2    | 1    | 3        | 4     | <i>Betula platyphylla</i> | High          | Lower          | Shady  | 1.464                            | 0.6285                  |
| 2    | 2    | 1        | 1     | <i>Betula platyphylla</i> | High          | Lower          | Shady  | 0.658                            | 2.3019                  |
| 2    | 2    | 1        | 2     | <i>Betula platyphylla</i> | High          | Lower          | Shady  | 1.089                            | 0.8492                  |

|   |   |   |   |                           |          |       |       |       |        |
|---|---|---|---|---------------------------|----------|-------|-------|-------|--------|
| 2 | 2 | 1 | 3 | <i>Betula platyphylla</i> | High     | Lower | Shady | 1.658 | 0.5345 |
| 2 | 2 | 1 | 4 | <i>Betula platyphylla</i> | High     | Lower | Shady | 1.507 | 0.5632 |
| 2 | 2 | 2 | 1 | <i>Betula platyphylla</i> | High     | Lower | Shady | 0.478 | 1.7927 |
| 2 | 2 | 2 | 2 | <i>Betula platyphylla</i> | High     | Lower | Shady | 0.949 | 1.0776 |
| 2 | 2 | 2 | 3 | <i>Betula platyphylla</i> | High     | Lower | Shady | 1.43  | 0.5599 |
| 2 | 2 | 2 | 4 | <i>Betula platyphylla</i> | High     | Lower | Shady | 1.743 | 0.5708 |
| 2 | 2 | 3 | 1 | <i>Betula platyphylla</i> | High     | Lower | Shady | 0.577 | 1.7828 |
| 2 | 2 | 3 | 2 | <i>Betula platyphylla</i> | High     | Lower | Shady | 0.886 | 1.0016 |
| 2 | 2 | 3 | 3 | <i>Betula platyphylla</i> | High     | Lower | Shady | 1.451 | 0.6938 |
| 2 | 2 | 3 | 4 | <i>Betula platyphylla</i> | High     | Lower | Shady | 1.261 | 0.4861 |
| 2 | 3 | 1 | 1 | <i>Betula platyphylla</i> | High     | Lower | Shady | 0.667 | 1.5602 |
| 2 | 3 | 1 | 2 | <i>Betula platyphylla</i> | High     | Lower | Shady | 0.935 | 1.4156 |
| 2 | 3 | 1 | 3 | <i>Betula platyphylla</i> | High     | Lower | Shady | 1.105 | 0.8850 |
| 2 | 3 | 1 | 4 | <i>Betula platyphylla</i> | High     | Lower | Shady | 1.709 | 0.5166 |
| 2 | 3 | 2 | 1 | <i>Betula platyphylla</i> | High     | Lower | Shady | 0.944 | 0.8429 |
| 2 | 3 | 2 | 2 | <i>Betula platyphylla</i> | High     | Lower | Shady | 1.036 | 1.0778 |
| 2 | 3 | 2 | 3 | <i>Betula platyphylla</i> | High     | Lower | Shady | 0.988 | 0.7609 |
| 2 | 3 | 2 | 4 | <i>Betula platyphylla</i> | High     | Lower | Shady | 1.371 | 0.5229 |
| 2 | 3 | 3 | 1 | <i>Betula platyphylla</i> | High     | Lower | Shady | 0.583 | 1.0128 |
| 2 | 3 | 3 | 2 | <i>Betula platyphylla</i> | High     | Lower | Shady | 1.02  | 0.7218 |
| 2 | 3 | 3 | 3 | <i>Betula platyphylla</i> | High     | Lower | Shady | 1.35  | 0.5724 |
| 2 | 3 | 3 | 4 | <i>Betula platyphylla</i> | High     | Lower | Shady | 1.637 | 0.5659 |
| 3 | 1 | 1 | 1 | <i>Larix gmelinii.</i>    | Unburned | Flat  | Flat  | 0.857 | 1.0061 |
| 3 | 1 | 1 | 2 | <i>Larix gmelinii.</i>    | Unburned | Flat  | Flat  | 1.443 | 1.6997 |
| 3 | 1 | 1 | 3 | <i>Larix gmelinii.</i>    | Unburned | Flat  | Flat  | 1.423 | 0.7224 |
| 3 | 1 | 1 | 4 | <i>Larix gmelinii.</i>    | Unburned | Flat  | Flat  | 1.315 | 0.7589 |
| 3 | 1 | 2 | 1 | <i>Larix gmelinii.</i>    | Unburned | Flat  | Flat  | 0.74  | 1.7092 |
| 3 | 1 | 2 | 2 | <i>Larix gmelinii.</i>    | Unburned | Flat  | Flat  | 1.24  | 0.9893 |
| 3 | 1 | 2 | 3 | <i>Larix gmelinii.</i>    | Unburned | Flat  | Flat  | 1.507 | 0.6551 |
| 3 | 1 | 2 | 4 | <i>Larix gmelinii.</i>    | Unburned | Flat  | Flat  | 1.68  | 0.5997 |
| 3 | 1 | 3 | 1 | <i>Larix gmelinii.</i>    | Unburned | Flat  | Flat  | 1.037 | 0.8047 |
| 3 | 1 | 3 | 2 | <i>Larix gmelinii.</i>    | Unburned | Flat  | Flat  | 1.605 | 0.7177 |
| 3 | 1 | 3 | 3 | <i>Larix gmelinii.</i>    | Unburned | Flat  | Flat  | 1.529 | 0.5350 |
| 3 | 1 | 3 | 4 | <i>Larix gmelinii.</i>    | Unburned | Flat  | Flat  | 1.569 | 0.6471 |
| 3 | 2 | 1 | 1 | <i>Larix gmelinii.</i>    | Unburned | Flat  | Flat  | 0.785 | 1.9946 |
| 3 | 2 | 1 | 2 | <i>Larix gmelinii.</i>    | Unburned | Flat  | Flat  | 1.299 | 1.0059 |
| 3 | 2 | 1 | 3 | <i>Larix gmelinii.</i>    | Unburned | Flat  | Flat  | 1.539 | 0.7637 |
| 3 | 2 | 1 | 4 | <i>Larix gmelinii.</i>    | Unburned | Flat  | Flat  | 1.463 | 1.0793 |
| 3 | 2 | 2 | 1 | <i>Larix gmelinii.</i>    | Unburned | Flat  | Flat  | 1.046 | 1.2384 |
| 3 | 2 | 2 | 2 | <i>Larix gmelinii.</i>    | Unburned | Flat  | Flat  | 1.321 | 0.7816 |
| 3 | 2 | 2 | 3 | <i>Larix gmelinii.</i>    | Unburned | Flat  | Flat  | 1.444 | 0.8989 |
| 3 | 2 | 2 | 4 | <i>Larix gmelinii.</i>    | Unburned | Flat  | Flat  | 1.288 | 0.9003 |
| 3 | 2 | 3 | 1 | <i>Larix gmelinii.</i>    | Unburned | Flat  | Flat  | 0.638 | 3.7244 |
| 3 | 2 | 3 | 2 | <i>Larix gmelinii.</i>    | Unburned | Flat  | Flat  | 1.187 | 2.1696 |

|   |   |   |   |                                         |          |        |       |       |        |
|---|---|---|---|-----------------------------------------|----------|--------|-------|-------|--------|
| 3 | 2 | 3 | 3 | <i>Larix gmelinii.</i>                  | Unburned | Flat   | Flat  | 0.956 | 1.2104 |
| 3 | 2 | 3 | 4 | <i>Larix gmelinii.</i>                  | Unburned | Flat   | Flat  | 1.103 | 1.0075 |
| 3 | 3 | 1 | 1 | <i>Larix gmelinii.</i>                  | Unburned | Flat   | Flat  | 0.901 | 2.4083 |
| 3 | 3 | 1 | 2 | <i>Larix gmelinii.</i>                  | Unburned | Flat   | Flat  | 1.129 | 1.4733 |
| 3 | 3 | 1 | 3 | <i>Larix gmelinii.</i>                  | Unburned | Flat   | Flat  | 1.129 | 1.2172 |
| 3 | 3 | 1 | 4 | <i>Larix gmelinii.</i>                  | Unburned | Flat   | Flat  | 0.897 | 1.0754 |
| 3 | 3 | 2 | 1 | <i>Larix gmelinii.</i>                  | Unburned | Flat   | Flat  | 0.871 | 2.6453 |
| 3 | 3 | 2 | 2 | <i>Larix gmelinii.</i>                  | Unburned | Flat   | Flat  | 1.153 | 1.5010 |
| 3 | 3 | 2 | 3 | <i>Larix gmelinii.</i>                  | Unburned | Flat   | Flat  | 1.177 | 1.8347 |
| 3 | 3 | 2 | 4 | <i>Larix gmelinii.</i>                  | Unburned | Flat   | Flat  | 1.402 | 1.1655 |
| 3 | 3 | 3 | 1 | <i>Larix gmelinii.</i>                  | Unburned | Flat   | Flat  | 0.88  | 3.7512 |
| 3 | 3 | 3 | 2 | <i>Larix gmelinii.</i>                  | Unburned | Flat   | Flat  | 1.463 | 1.2000 |
| 3 | 3 | 3 | 3 | <i>Larix gmelinii.</i>                  | Unburned | Flat   | Flat  | 1.329 | 0.9574 |
| 3 | 3 | 3 | 4 | <i>Larix gmelinii.</i>                  | Unburned | Flat   | Flat  | 1.34  | 1.0133 |
| 4 | 1 | 1 | 1 | <i>Populus davidiana</i>                | High     | Upper  | Sunny | 0.46  | 0.8180 |
| 4 | 1 | 1 | 2 | <i>Populus davidiana</i>                | High     | Upper  | Sunny | 0.732 | 1.4009 |
| 4 | 1 | 2 | 1 | <i>Populus davidiana</i>                | High     | Upper  | Sunny | 0.517 | 2.1803 |
| 4 | 1 | 2 | 2 | <i>Populus davidiana</i>                | High     | Upper  | Sunny | 0.77  | 0.7598 |
| 4 | 1 | 3 | 1 | <i>Populus davidiana</i>                | High     | Upper  | Sunny | 0.655 | 2.1405 |
| 4 | 1 | 3 | 2 | <i>Populus davidiana</i>                | High     | Upper  | Sunny | 0.762 | 1.2508 |
| 4 | 1 | 3 | 3 | <i>Populus davidiana</i>                | High     | Upper  | Sunny | 1.071 | 0.6376 |
| 4 | 2 | 1 | 1 | <i>Populus davidiana</i>                | High     | Upper  | Sunny | 0.583 | 1.2858 |
| 4 | 2 | 1 | 2 | <i>Populus davidiana</i>                | High     | Upper  | Sunny | 1.089 | 0.8618 |
| 4 | 2 | 1 | 3 | <i>Populus davidiana</i>                | High     | Upper  | Sunny | 0.99  | 0.8593 |
| 4 | 2 | 2 | 1 | <i>Populus davidiana</i>                | High     | Upper  | Sunny | 0.527 | 1.0874 |
| 4 | 2 | 2 | 2 | <i>Populus davidiana</i>                | High     | Upper  | Sunny | 1.391 | 0.4626 |
| 4 | 2 | 2 | 3 | <i>Populus davidiana</i>                | High     | Upper  | Sunny | 1.014 | 0.5831 |
| 4 | 2 | 3 | 1 | <i>Populus davidiana</i>                | High     | Upper  | Sunny | 0.991 | 0.8337 |
| 4 | 2 | 3 | 2 | <i>Populus davidiana</i>                | High     | Upper  | Sunny | 1.311 | 0.5350 |
| 4 | 2 | 3 | 3 | <i>Populus davidiana</i>                | High     | Upper  | Sunny | 1.109 | 0.6035 |
| 4 | 3 | 1 | 1 | <i>Populus davidiana</i>                | High     | Upper  | Sunny | 0.985 | 0.7429 |
| 4 | 3 | 1 | 2 | <i>Populus davidiana</i>                | High     | Upper  | Sunny | 1.282 | 0.6234 |
| 4 | 3 | 1 | 3 | <i>Populus davidiana</i>                | High     | Upper  | Sunny | 1.545 | 0.5780 |
| 4 | 3 | 1 | 4 | <i>Populus davidiana</i>                | High     | Upper  | Sunny | 1.51  | 0.5271 |
| 4 | 3 | 2 | 1 | <i>Populus davidiana</i>                | High     | Upper  | Sunny | 0.666 | 0.8057 |
| 4 | 3 | 2 | 2 | <i>Populus davidiana</i>                | High     | Upper  | Sunny | 1.285 | 0.7212 |
| 4 | 3 | 2 | 3 | <i>Populus davidiana</i>                | High     | Upper  | Sunny | 0.831 | 1.6031 |
| 4 | 3 | 2 | 4 | <i>Populus davidiana</i>                | High     | Upper  | Sunny | 1.175 | 0.7303 |
| 4 | 3 | 3 | 1 | <i>Populus davidiana</i>                | High     | Upper  | Sunny | 0.777 | 3.6596 |
| 4 | 3 | 3 | 2 | <i>Populus davidiana</i>                | High     | Upper  | Sunny | 1.176 | 1.7902 |
| 4 | 3 | 3 | 3 | <i>Populus davidiana</i>                | High     | Upper  | Sunny | 1.297 | 1.1831 |
| 4 | 3 | 3 | 4 | <i>Populus davidiana</i>                | High     | Upper  | Sunny | 1.242 | 0.9984 |
| 5 | 1 | 1 | 1 | <i>Pinus sylvestris var. mongolica.</i> | Low      | Middle | Sunny | 1.011 | 1.1692 |
| 5 | 1 | 1 | 2 | <i>Pinus sylvestris var. mongolica.</i> | Low      | Middle | Sunny | 1.217 | 1.1116 |

|   |   |   |   |                                         |     |        |       |       |        |
|---|---|---|---|-----------------------------------------|-----|--------|-------|-------|--------|
| 5 | 1 | 1 | 3 | <i>Pinus sylvestris var. mongolica.</i> | Low | Middle | Sunny | 1.39  | 0.7009 |
| 5 | 1 | 1 | 4 | <i>Pinus sylvestris var. mongolica.</i> | Low | Middle | Sunny | 1.293 | 0.8371 |
| 5 | 1 | 2 | 1 | <i>Pinus sylvestris var. mongolica.</i> | Low | Middle | Sunny | 0.901 | 1.6325 |
| 5 | 1 | 2 | 2 | <i>Pinus sylvestris var. mongolica.</i> | Low | Middle | Sunny | 0.934 | 1.1978 |
| 5 | 1 | 2 | 3 | <i>Pinus sylvestris var. mongolica.</i> | Low | Middle | Sunny | 1.115 | 0.8481 |
| 5 | 1 | 2 | 4 | <i>Pinus sylvestris var. mongolica.</i> | Low | Middle | Sunny | 1.145 | 0.9531 |
| 5 | 1 | 3 | 1 | <i>Pinus sylvestris var. mongolica.</i> | Low | Middle | Sunny | 0.591 | 1.5630 |
| 5 | 1 | 3 | 2 | <i>Pinus sylvestris var. mongolica.</i> | Low | Middle | Sunny | 0.623 | 1.5194 |
| 5 | 1 | 3 | 3 | <i>Pinus sylvestris var. mongolica.</i> | Low | Middle | Sunny | 1.008 | 0.8218 |
| 5 | 2 | 1 | 1 | <i>Pinus sylvestris var. mongolica.</i> | Low | Middle | Sunny | 0.958 | 1.0491 |
| 5 | 2 | 1 | 2 | <i>Pinus sylvestris var. mongolica.</i> | Low | Middle | Sunny | 0.842 | 0.8974 |
| 5 | 2 | 1 | 3 | <i>Pinus sylvestris var. mongolica.</i> | Low | Middle | Sunny | 1.424 | 0.7237 |
| 5 | 2 | 2 | 1 | <i>Pinus sylvestris var. mongolica.</i> | Low | Middle | Sunny | 0.586 | 1.3365 |
| 5 | 2 | 2 | 2 | <i>Pinus sylvestris var. mongolica.</i> | Low | Middle | Sunny | 0.819 | 1.3493 |
| 5 | 2 | 3 | 1 | <i>Pinus sylvestris var. mongolica.</i> | Low | Middle | Sunny | 0.608 | 0.6648 |
| 5 | 3 | 1 | 1 | <i>Pinus sylvestris var. mongolica.</i> | Low | Middle | Sunny | 0.668 | 0.7530 |
| 5 | 3 | 1 | 2 | <i>Pinus sylvestris var. mongolica.</i> | Low | Middle | Sunny | 1.071 | 0.8892 |
| 5 | 3 | 1 | 3 | <i>Pinus sylvestris var. mongolica.</i> | Low | Middle | Sunny | 1.346 | 0.7891 |
| 5 | 3 | 2 | 1 | <i>Pinus sylvestris var. mongolica.</i> | Low | Middle | Sunny | 1.034 | 0.8773 |
| 5 | 3 | 2 | 2 | <i>Pinus sylvestris var. mongolica.</i> | Low | Middle | Sunny | 1.23  | 0.6804 |
| 5 | 3 | 2 | 3 | <i>Pinus sylvestris var. mongolica.</i> | Low | Middle | Sunny | 1.013 | 0.6437 |
| 5 | 3 | 3 | 1 | <i>Pinus sylvestris var. mongolica.</i> | Low | Middle | Sunny | 0.603 | 2.1563 |
| 5 | 3 | 3 | 2 | <i>Pinus sylvestris var. mongolica.</i> | Low | Middle | Sunny | 0.881 | 1.5546 |
| 5 | 3 | 3 | 3 | <i>Pinus sylvestris var. mongolica.</i> | Low | Middle | Sunny | 1.102 | 0.6000 |
| 6 | 1 | 1 | 1 | <i>Pinus sylvestris var. mongolica.</i> | Low | Lower  | Sunny | 0.833 | 1.5245 |
| 6 | 1 | 1 | 2 | <i>Pinus sylvestris var. mongolica.</i> | Low | Lower  | Sunny | 1.326 | 0.7038 |
| 6 | 1 | 1 | 3 | <i>Pinus sylvestris var. mongolica.</i> | Low | Lower  | Sunny | 1.302 | 0.4451 |
| 6 | 1 | 1 | 4 | <i>Pinus sylvestris var. mongolica.</i> | Low | Lower  | Sunny | 1.446 | 0.5301 |
| 6 | 1 | 2 | 1 | <i>Pinus sylvestris var. mongolica.</i> | Low | Lower  | Sunny | 1.073 | 0.8471 |
| 6 | 1 | 2 | 2 | <i>Pinus sylvestris var. mongolica.</i> | Low | Lower  | Sunny | 1.278 | 0.7624 |
| 6 | 1 | 2 | 3 | <i>Pinus sylvestris var. mongolica.</i> | Low | Lower  | Sunny | 1.533 | 0.6855 |
| 6 | 1 | 2 | 4 | <i>Pinus sylvestris var. mongolica.</i> | Low | Lower  | Sunny | 1.675 | 0.7388 |
| 6 | 1 | 3 | 1 | <i>Pinus sylvestris var. mongolica.</i> | Low | Lower  | Sunny | 1.026 | 0.8400 |
| 6 | 1 | 3 | 2 | <i>Pinus sylvestris var. mongolica.</i> | Low | Lower  | Sunny | 1.286 | 0.7737 |
| 6 | 1 | 3 | 3 | <i>Pinus sylvestris var. mongolica.</i> | Low | Lower  | Sunny | 1.375 | 0.7736 |
| 6 | 1 | 3 | 4 | <i>Pinus sylvestris var. mongolica.</i> | Low | Lower  | Sunny | 1.339 | 0.2999 |
| 6 | 2 | 1 | 1 | <i>Pinus sylvestris var. mongolica.</i> | Low | Lower  | Sunny | 0.942 | 0.5520 |
| 6 | 2 | 1 | 2 | <i>Pinus sylvestris var. mongolica.</i> | Low | Lower  | Sunny | 1.368 | 0.8489 |
| 6 | 2 | 1 | 3 | <i>Pinus sylvestris var. mongolica.</i> | Low | Lower  | Sunny | 1.184 | 0.4937 |
| 6 | 2 | 1 | 4 | <i>Pinus sylvestris var. mongolica.</i> | Low | Lower  | Sunny | 1.373 | 0.4295 |
| 6 | 2 | 2 | 1 | <i>Pinus sylvestris var. mongolica.</i> | Low | Lower  | Sunny | 0.891 | 0.8886 |
| 6 | 2 | 2 | 2 | <i>Pinus sylvestris var. mongolica.</i> | Low | Lower  | Sunny | 1.122 | 0.7627 |
| 6 | 2 | 2 | 3 | <i>Pinus sylvestris var. mongolica.</i> | Low | Lower  | Sunny | 1.032 | 0.7278 |
| 6 | 2 | 2 | 4 | <i>Pinus sylvestris var. mongolica.</i> | Low | Lower  | Sunny | 1.58  | 0.5433 |

|   |   |   |   |                                         |          |        |       |       |         |
|---|---|---|---|-----------------------------------------|----------|--------|-------|-------|---------|
| 6 | 2 | 3 | 1 | <i>Pinus sylvestris var. mongolica.</i> | Low      | Lower  | Sunny | 1.444 | 0.4933  |
| 6 | 2 | 3 | 2 | <i>Pinus sylvestris var. mongolica.</i> | Low      | Lower  | Sunny | 1.206 | 0.4311  |
| 6 | 3 | 1 | 1 | <i>Pinus sylvestris var. mongolica.</i> | Low      | Lower  | Sunny | 1.276 | 0.8600  |
| 6 | 3 | 1 | 2 | <i>Pinus sylvestris var. mongolica.</i> | Low      | Lower  | Sunny | 1.611 | 0.5243  |
| 6 | 3 | 1 | 3 | <i>Pinus sylvestris var. mongolica.</i> | Low      | Lower  | Sunny | 1.595 | 0.1371  |
| 6 | 3 | 1 | 4 | <i>Pinus sylvestris var. mongolica.</i> | Low      | Lower  | Sunny | 1.113 | 0.3460  |
| 6 | 3 | 2 | 1 | <i>Pinus sylvestris var. mongolica.</i> | Low      | Lower  | Sunny | 0.621 | 1.9924  |
| 6 | 3 | 2 | 2 | <i>Pinus sylvestris var. mongolica.</i> | Low      | Lower  | Sunny | 0.728 | 1.8380  |
| 6 | 3 | 2 | 3 | <i>Pinus sylvestris var. mongolica.</i> | Low      | Lower  | Sunny | 0.881 | 1.0339  |
| 6 | 3 | 3 | 1 | <i>Pinus sylvestris var. mongolica.</i> | Low      | Lower  | Sunny | 1.151 | 4.5783  |
| 6 | 3 | 3 | 2 | <i>Pinus sylvestris var. mongolica.</i> | Low      | Lower  | Sunny | 1.585 | 0.5465  |
| 6 | 3 | 3 | 3 | <i>Pinus sylvestris var. mongolica.</i> | Low      | Lower  | Sunny | 1.614 | 0.4378  |
| 6 | 3 | 3 | 4 | <i>Pinus sylvestris var. mongolica.</i> | Low      | Lower  | Sunny | 1.317 | 0.8743  |
| 7 | 1 | 1 | 1 | <i>Larix gmelinii.</i>                  | Unburned | Middle | Shady | 0.76  | 1.0160  |
| 7 | 1 | 1 | 2 | <i>Larix gmelinii.</i>                  | Unburned | Middle | Shady | 0.749 | 1.5367  |
| 7 | 1 | 1 | 3 | <i>Larix gmelinii.</i>                  | Unburned | Middle | Shady | 1.399 | 0.4403  |
| 7 | 1 | 1 | 4 | <i>Larix gmelinii.</i>                  | Unburned | Middle | Shady | 1.535 | 0.4160  |
| 7 | 1 | 2 | 1 | <i>Larix gmelinii.</i>                  | Unburned | Middle | Shady | 0.886 | 1.0242  |
| 7 | 1 | 2 | 2 | <i>Larix gmelinii.</i>                  | Unburned | Middle | Shady | 1.028 | 0.5661  |
| 7 | 1 | 2 | 3 | <i>Larix gmelinii.</i>                  | Unburned | Middle | Shady | 1.305 | 0.5699  |
| 7 | 1 | 2 | 4 | <i>Larix gmelinii.</i>                  | Unburned | Middle | Shady | 1.187 | 0.3928  |
| 7 | 1 | 3 | 1 | <i>Larix gmelinii.</i>                  | Unburned | Middle | Shady | 0.789 | 0.8166  |
| 7 | 1 | 3 | 2 | <i>Larix gmelinii.</i>                  | Unburned | Middle | Shady | 1.498 | 0.9257  |
| 7 | 1 | 3 | 3 | <i>Larix gmelinii.</i>                  | Unburned | Middle | Shady | 1.376 | 0.7925  |
| 7 | 1 | 3 | 4 | <i>Larix gmelinii.</i>                  | Unburned | Middle | Shady | 1.606 | 0.8000  |
| 7 | 2 | 1 | 1 | <i>Larix gmelinii.</i>                  | Unburned | Middle | Shady | 0.71  | 1.2578  |
| 7 | 2 | 1 | 2 | <i>Larix gmelinii.</i>                  | Unburned | Middle | Shady | 1.06  | 1.1283  |
| 7 | 2 | 1 | 3 | <i>Larix gmelinii.</i>                  | Unburned | Middle | Shady | 1.51  | 0.4443  |
| 7 | 2 | 1 | 4 | <i>Larix gmelinii.</i>                  | Unburned | Middle | Shady | 1.209 | 0.6579  |
| 7 | 2 | 2 | 1 | <i>Larix gmelinii.</i>                  | Unburned | Middle | Shady | 0.685 | 1.1772  |
| 7 | 2 | 2 | 2 | <i>Larix gmelinii.</i>                  | Unburned | Middle | Shady | 0.913 | 0.9655  |
| 7 | 2 | 2 | 3 | <i>Larix gmelinii.</i>                  | Unburned | Middle | Shady | 1.295 | 1.8463  |
| 7 | 2 | 2 | 4 | <i>Larix gmelinii.</i>                  | Unburned | Middle | Shady | 1.305 | 0.5249  |
| 7 | 2 | 3 | 1 | <i>Larix gmelinii.</i>                  | Unburned | Middle | Shady | 0.688 | 1.9370  |
| 7 | 2 | 3 | 2 | <i>Larix gmelinii.</i>                  | Unburned | Middle | Shady | 1.317 | 0.8035  |
| 7 | 2 | 3 | 3 | <i>Larix gmelinii.</i>                  | Unburned | Middle | Shady | 0.998 | 1.1479  |
| 7 | 3 | 1 | 1 | <i>Larix gmelinii.</i>                  | Unburned | Middle | Shady | 0.641 | 15.3326 |
| 7 | 3 | 1 | 2 | <i>Larix gmelinii.</i>                  | Unburned | Middle | Shady | 0.808 | 7.7192  |
| 7 | 3 | 1 | 3 | <i>Larix gmelinii.</i>                  | Unburned | Middle | Shady | 1.025 | 1.3464  |
| 7 | 3 | 1 | 4 | <i>Larix gmelinii.</i>                  | Unburned | Middle | Shady | 1.198 | 1.2381  |
| 7 | 3 | 2 | 1 | <i>Larix gmelinii.</i>                  | Unburned | Middle | Shady | 0.741 | 2.4952  |
| 7 | 3 | 2 | 2 | <i>Larix gmelinii.</i>                  | Unburned | Middle | Shady | 0.966 | 3.7461  |
| 7 | 3 | 2 | 3 | <i>Larix gmelinii.</i>                  | Unburned | Middle | Shady | 1.196 | 1.6923  |
| 7 | 3 | 2 | 4 | <i>Larix gmelinii.</i>                  | Unburned | Middle | Shady | 1.258 | 1.1467  |



|   |   |   |   |                                         |          |        |       |       |         |
|---|---|---|---|-----------------------------------------|----------|--------|-------|-------|---------|
| 7 | 3 | 3 | 1 | <i>Larix gmelinii.</i>                  | Unburned | Middle | Shady | 0.793 | 2.6663  |
| 7 | 3 | 3 | 2 | <i>Larix gmelinii.</i>                  | Unburned | Middle | Shady | 1.029 | 2.2468  |
| 7 | 3 | 3 | 3 | <i>Larix gmelinii.</i>                  | Unburned | Middle | Shady | 1.151 | 0.7016  |
| 7 | 3 | 3 | 4 | <i>Larix gmelinii.</i>                  | Unburned | Middle | Shady | 1.271 | 0.8266  |
| 8 | 1 | 1 | 1 | <i>Larix gmelinii.</i>                  | Unburned | Toe    | Shady | 0.895 | 1.6817  |
| 8 | 1 | 1 | 2 | <i>Larix gmelinii.</i>                  | Unburned | Toe    | Shady | 1.383 | 0.7761  |
| 8 | 1 | 1 | 3 | <i>Larix gmelinii.</i>                  | Unburned | Toe    | Shady | 1.444 | 1.5414  |
| 8 | 1 | 1 | 4 | <i>Larix gmelinii.</i>                  | Unburned | Toe    | Shady | 1.297 | 0.3419  |
| 8 | 1 | 2 | 1 | <i>Larix gmelinii.</i>                  | Unburned | Toe    | Shady | 0.482 | 2.0186  |
| 8 | 1 | 2 | 2 | <i>Larix gmelinii.</i>                  | Unburned | Toe    | Shady | 0.608 | 1.3680  |
| 8 | 1 | 2 | 3 | <i>Larix gmelinii.</i>                  | Unburned | Toe    | Shady | 0.756 | 1.3297  |
| 8 | 1 | 2 | 4 | <i>Larix gmelinii.</i>                  | Unburned | Toe    | Shady | 0.753 | 1.1785  |
| 8 | 1 | 3 | 1 | <i>Larix gmelinii.</i>                  | Unburned | Toe    | Shady | 0.517 | 1.0859  |
| 8 | 1 | 3 | 2 | <i>Larix gmelinii.</i>                  | Unburned | Toe    | Shady | 1.114 | 0.6177  |
| 8 | 1 | 3 | 3 | <i>Larix gmelinii.</i>                  | Unburned | Toe    | Shady | 0.981 | 0.6872  |
| 8 | 1 | 3 | 4 | <i>Larix gmelinii.</i>                  | Unburned | Toe    | Shady | 1.78  | 0.4358  |
| 8 | 2 | 1 | 1 | <i>Larix gmelinii.</i>                  | Unburned | Toe    | Shady | 0.503 | 1.9129  |
| 8 | 2 | 1 | 2 | <i>Larix gmelinii.</i>                  | Unburned | Toe    | Shady | 0.797 | 1.4005  |
| 8 | 2 | 1 | 3 | <i>Larix gmelinii.</i>                  | Unburned | Toe    | Shady | 1.251 | 0.4796  |
| 8 | 2 | 1 | 4 | <i>Larix gmelinii.</i>                  | Unburned | Toe    | Shady | 1.388 | 0.5605  |
| 8 | 2 | 2 | 1 | <i>Larix gmelinii.</i>                  | Unburned | Toe    | Shady | 0.378 | 16.8404 |
| 8 | 2 | 2 | 2 | <i>Larix gmelinii.</i>                  | Unburned | Toe    | Shady | 0.764 | 12.2391 |
| 8 | 2 | 2 | 3 | <i>Larix gmelinii.</i>                  | Unburned | Toe    | Shady | 1.179 | 5.6525  |
| 8 | 2 | 2 | 4 | <i>Larix gmelinii.</i>                  | Unburned | Toe    | Shady | 1.369 | 1.0838  |
| 8 | 2 | 3 | 1 | <i>Larix gmelinii.</i>                  | Unburned | Toe    | Shady | 0.335 | 6.5047  |
| 8 | 2 | 3 | 2 | <i>Larix gmelinii.</i>                  | Unburned | Toe    | Shady | 1.093 | 2.9659  |
| 8 | 2 | 3 | 3 | <i>Larix gmelinii.</i>                  | Unburned | Toe    | Shady | 1.135 | 1.1378  |
| 8 | 3 | 1 | 1 | <i>Larix gmelinii.</i>                  | Unburned | Toe    | Shady | 0.437 | 3.3086  |
| 8 | 3 | 1 | 2 | <i>Larix gmelinii.</i>                  | Unburned | Toe    | Shady | 0.983 | 2.3078  |
| 8 | 3 | 1 | 3 | <i>Larix gmelinii.</i>                  | Unburned | Toe    | Shady | 1.442 | 0.8958  |
| 8 | 3 | 1 | 4 | <i>Larix gmelinii.</i>                  | Unburned | Toe    | Shady | 1.591 | 0.6113  |
| 8 | 3 | 2 | 1 | <i>Larix gmelinii.</i>                  | Unburned | Toe    | Shady | 0.348 | 3.0172  |
| 8 | 3 | 2 | 2 | <i>Larix gmelinii.</i>                  | Unburned | Toe    | Shady | 0.762 | 2.7329  |
| 8 | 3 | 2 | 3 | <i>Larix gmelinii.</i>                  | Unburned | Toe    | Shady | 0.799 | 1.4942  |
| 8 | 3 | 2 | 4 | <i>Larix gmelinii.</i>                  | Unburned | Toe    | Shady | 0.77  | 1.3007  |
| 8 | 3 | 3 | 1 | <i>Larix gmelinii.</i>                  | Unburned | Toe    | Shady | 0.953 | 0.5338  |
| 8 | 3 | 3 | 2 | <i>Larix gmelinii.</i>                  | Unburned | Toe    | Shady | 1.187 | 1.5017  |
| 8 | 3 | 3 | 3 | <i>Larix gmelinii.</i>                  | Unburned | Toe    | Shady | 1.638 | 0.6682  |
| 8 | 3 | 3 | 4 | <i>Larix gmelinii.</i>                  | Unburned | Toe    | Shady | 1.354 | 0.5911  |
| 9 | 1 | 1 | 1 | <i>Pinus sylvestris var. mongolica.</i> | Unburned | Middle | Sunny | 1.009 | 0.8234  |
| 9 | 1 | 1 | 2 | <i>Pinus sylvestris var. mongolica.</i> | Unburned | Middle | Sunny | 1.349 | 0.6211  |
| 9 | 1 | 1 | 3 | <i>Pinus sylvestris var. mongolica.</i> | Unburned | Middle | Sunny | 1.269 | 0.6396  |
| 9 | 1 | 1 | 4 | <i>Pinus sylvestris var. mongolica.</i> | Unburned | Middle | Sunny | 1.28  | 0.5002  |
| 9 | 1 | 2 | 1 | <i>Pinus sylvestris var. mongolica.</i> | Unburned | Middle | Sunny | 0.918 | 0.5585  |

|    |   |   |   |                                         |          |        |       |       |        |
|----|---|---|---|-----------------------------------------|----------|--------|-------|-------|--------|
| 9  | 1 | 2 | 2 | <i>Pinus sylvestris var. mongolica.</i> | Unburned | Middle | Sunny | 1.405 | 0.4751 |
| 9  | 1 | 2 | 3 | <i>Pinus sylvestris var. mongolica.</i> | Unburned | Middle | Sunny | 1.547 | 0.3730 |
| 9  | 1 | 2 | 4 | <i>Pinus sylvestris var. mongolica.</i> | Unburned | Middle | Sunny | 1.555 | 0.4194 |
| 9  | 1 | 3 | 1 | <i>Pinus sylvestris var. mongolica.</i> | Unburned | Middle | Sunny | 1.22  | 0.6096 |
| 9  | 1 | 3 | 2 | <i>Pinus sylvestris var. mongolica.</i> | Unburned | Middle | Sunny | 1.197 | 0.5104 |
| 9  | 1 | 3 | 3 | <i>Pinus sylvestris var. mongolica.</i> | Unburned | Middle | Sunny | 1.474 | 0.9011 |
| 9  | 1 | 3 | 4 | <i>Pinus sylvestris var. mongolica.</i> | Unburned | Middle | Sunny | 1.589 | 0.8816 |
| 9  | 2 | 1 | 1 | <i>Pinus sylvestris var. mongolica.</i> | Unburned | Middle | Sunny | 1.095 | 1.8848 |
| 9  | 2 | 1 | 2 | <i>Pinus sylvestris var. mongolica.</i> | Unburned | Middle | Sunny | 1.197 | 0.2684 |
| 9  | 2 | 1 | 3 | <i>Pinus sylvestris var. mongolica.</i> | Unburned | Middle | Sunny | 1.302 | 0.9246 |
| 9  | 2 | 1 | 4 | <i>Pinus sylvestris var. mongolica.</i> | Unburned | Middle | Sunny | 1.319 | 0.8026 |
| 9  | 2 | 2 | 1 | <i>Pinus sylvestris var. mongolica.</i> | Unburned | Middle | Sunny | 0.7   | 1.7284 |
| 9  | 2 | 2 | 2 | <i>Pinus sylvestris var. mongolica.</i> | Unburned | Middle | Sunny | 0.82  | 0.9257 |
| 9  | 2 | 2 | 3 | <i>Pinus sylvestris var. mongolica.</i> | Unburned | Middle | Sunny | 0.917 | 0.7697 |
| 9  | 2 | 2 | 4 | <i>Pinus sylvestris var. mongolica.</i> | Unburned | Middle | Sunny | 1.107 | 0.8520 |
| 9  | 2 | 3 | 1 | <i>Pinus sylvestris var. mongolica.</i> | Unburned | Middle | Sunny | 1.037 | 0.6066 |
| 9  | 2 | 3 | 2 | <i>Pinus sylvestris var. mongolica.</i> | Unburned | Middle | Sunny | 1.252 | 0.7371 |
| 9  | 2 | 3 | 3 | <i>Pinus sylvestris var. mongolica.</i> | Unburned | Middle | Sunny | 1.501 | 0.5462 |
| 9  | 2 | 3 | 4 | <i>Pinus sylvestris var. mongolica.</i> | Unburned | Middle | Sunny | 1.438 | 0.5247 |
| 9  | 3 | 1 | 1 | <i>Pinus sylvestris var. mongolica.</i> | Unburned | Middle | Sunny | 1.175 | 0.6157 |
| 9  | 3 | 1 | 2 | <i>Pinus sylvestris var. mongolica.</i> | Unburned | Middle | Sunny | 1.222 | 0.6501 |
| 9  | 3 | 1 | 3 | <i>Pinus sylvestris var. mongolica.</i> | Unburned | Middle | Sunny | 1.538 | 0.5398 |
| 9  | 3 | 1 | 4 | <i>Pinus sylvestris var. mongolica.</i> | Unburned | Middle | Sunny | 1.437 | 0.6809 |
| 9  | 3 | 2 | 1 | <i>Pinus sylvestris var. mongolica.</i> | Unburned | Middle | Sunny | 1.425 | 0.6939 |
| 9  | 3 | 2 | 2 | <i>Pinus sylvestris var. mongolica.</i> | Unburned | Middle | Sunny | 1.294 | 0.5451 |
| 9  | 3 | 2 | 3 | <i>Pinus sylvestris var. mongolica.</i> | Unburned | Middle | Sunny | 1.334 | 0.6169 |
| 9  | 3 | 2 | 4 | <i>Pinus sylvestris var. mongolica.</i> | Unburned | Middle | Sunny | 1.272 | 0.9950 |
| 9  | 3 | 3 | 1 | <i>Pinus sylvestris var. mongolica.</i> | Unburned | Middle | Sunny | 0.745 | 0.5784 |
| 9  | 3 | 3 | 2 | <i>Pinus sylvestris var. mongolica.</i> | Unburned | Middle | Sunny | 1.344 | 0.5257 |
| 9  | 3 | 3 | 3 | <i>Pinus sylvestris var. mongolica.</i> | Unburned | Middle | Sunny | 1.376 | 0.5664 |
| 9  | 3 | 3 | 4 | <i>Pinus sylvestris var. mongolica.</i> | Unburned | Middle | Sunny | 1.476 | 0.4908 |
| 10 | 1 | 1 | 1 | <i>Pinus sylvestris var. mongolica.</i> | Unburned | Toe    | Sunny | 0.392 | 0.8504 |
| 10 | 1 | 1 | 2 | <i>Pinus sylvestris var. mongolica.</i> | Unburned | Toe    | Sunny | 0.954 | 0.7841 |
| 10 | 1 | 1 | 3 | <i>Pinus sylvestris var. mongolica.</i> | Unburned | Toe    | Sunny | 1.531 | 0.6868 |
| 10 | 1 | 1 | 4 | <i>Pinus sylvestris var. mongolica.</i> | Unburned | Toe    | Sunny | 1.398 | 0.6921 |
| 10 | 1 | 2 | 1 | <i>Pinus sylvestris var. mongolica.</i> | Unburned | Toe    | Sunny | 0.72  | 0.8921 |
| 10 | 1 | 2 | 2 | <i>Pinus sylvestris var. mongolica.</i> | Unburned | Toe    | Sunny | 0.952 | 0.8246 |
| 10 | 1 | 2 | 3 | <i>Pinus sylvestris var. mongolica.</i> | Unburned | Toe    | Sunny | 1.225 | 0.5736 |
| 10 | 1 | 2 | 4 | <i>Pinus sylvestris var. mongolica.</i> | Unburned | Toe    | Sunny | 1.442 | 0.6213 |
| 10 | 1 | 3 | 1 | <i>Pinus sylvestris var. mongolica.</i> | Unburned | Toe    | Sunny | 0.912 | 0.6152 |
| 10 | 1 | 3 | 2 | <i>Pinus sylvestris var. mongolica.</i> | Unburned | Toe    | Sunny | 1.064 | 0.3569 |
| 10 | 1 | 3 | 3 | <i>Pinus sylvestris var. mongolica.</i> | Unburned | Toe    | Sunny | 1.272 | 0.5759 |
| 10 | 1 | 3 | 4 | <i>Pinus sylvestris var. mongolica.</i> | Unburned | Toe    | Sunny | 1.46  | 0.4768 |
| 10 | 2 | 1 | 1 | <i>Pinus sylvestris var. mongolica.</i> | Unburned | Toe    | Sunny | 1.189 | 0.6115 |

|    |   |   |   |                                         |          |       |       |        |         |
|----|---|---|---|-----------------------------------------|----------|-------|-------|--------|---------|
| 10 | 2 | 1 | 2 | <i>Pinus sylvestris var. mongolica.</i> | Unburned | Toe   | Sunny | 1.292  | 0.5728  |
| 10 | 2 | 1 | 3 | <i>Pinus sylvestris var. mongolica.</i> | Unburned | Toe   | Sunny | 1.384  | 0.4625  |
| 10 | 2 | 1 | 4 | <i>Pinus sylvestris var. mongolica.</i> | Unburned | Toe   | Sunny | 1.358  | 0.5100  |
| 10 | 2 | 2 | 1 | <i>Pinus sylvestris var. mongolica.</i> | Unburned | Toe   | Sunny | 1.235  | 0.4571  |
| 10 | 2 | 2 | 2 | <i>Pinus sylvestris var. mongolica.</i> | Unburned | Toe   | Sunny | 1.3    | 0.4822  |
| 10 | 2 | 2 | 3 | <i>Pinus sylvestris var. mongolica.</i> | Unburned | Toe   | Sunny | 1.334  | 0.6841  |
| 10 | 2 | 2 | 4 | <i>Pinus sylvestris var. mongolica.</i> | Unburned | Toe   | Sunny | 1.576  | 0.4443  |
| 10 | 2 | 3 | 1 | <i>Pinus sylvestris var. mongolica.</i> | Unburned | Toe   | Sunny | 0.753  | 0.6652  |
| 10 | 2 | 3 | 2 | <i>Pinus sylvestris var. mongolica.</i> | Unburned | Toe   | Sunny | 1.193  | 0.7568  |
| 10 | 2 | 3 | 3 | <i>Pinus sylvestris var. mongolica.</i> | Unburned | Toe   | Sunny | 1.471  | 0.6377  |
| 10 | 2 | 3 | 4 | <i>Pinus sylvestris var. mongolica.</i> | Unburned | Toe   | Sunny | 1.457  | 0.5626  |
| 10 | 3 | 1 | 1 | <i>Pinus sylvestris var. mongolica.</i> | Unburned | Toe   | Sunny | 0.842  | 1.3649  |
| 10 | 3 | 1 | 2 | <i>Pinus sylvestris var. mongolica.</i> | Unburned | Toe   | Sunny | 1.139  | 1.3270  |
| 10 | 3 | 1 | 3 | <i>Pinus sylvestris var. mongolica.</i> | Unburned | Toe   | Sunny | 1.302  | 0.9303  |
| 10 | 3 | 1 | 4 | <i>Pinus sylvestris var. mongolica.</i> | Unburned | Toe   | Sunny | 1.254  | 1.0959  |
| 10 | 3 | 2 | 1 | <i>Pinus sylvestris var. mongolica.</i> | Unburned | Toe   | Sunny | 0.94   | 0.9206  |
| 10 | 3 | 2 | 2 | <i>Pinus sylvestris var. mongolica.</i> | Unburned | Toe   | Sunny | 1.213  | 1.7707  |
| 10 | 3 | 2 | 3 | <i>Pinus sylvestris var. mongolica.</i> | Unburned | Toe   | Sunny | 1.082  | 5.4170  |
| 10 | 3 | 2 | 4 | <i>Pinus sylvestris var. mongolica.</i> | Unburned | Toe   | Sunny | 1.455  | 1.0688  |
| 10 | 3 | 3 | 1 | <i>Pinus sylvestris var. mongolica.</i> | Unburned | Toe   | Sunny | 0.799  | 9.8310  |
| 10 | 3 | 3 | 2 | <i>Pinus sylvestris var. mongolica.</i> | Unburned | Toe   | Sunny | 1.018  | 5.5528  |
| 10 | 3 | 3 | 3 | <i>Pinus sylvestris var. mongolica.</i> | Unburned | Toe   | Sunny | 1.215  | 1.3938  |
| 10 | 3 | 3 | 4 | <i>Pinus sylvestris var. mongolica.</i> | Unburned | Toe   | Sunny | 1.275  | 0.9170  |
| 11 | 1 | 1 | 1 | <i>Larix gmelinii.</i>                  | Moderate | Lower | Shady | 0.169  | 16.6751 |
| 11 | 1 | 1 | 2 | <i>Larix gmelinii.</i>                  | Moderate | Lower | Shady | 0.563  | 9.9972  |
| 11 | 1 | 1 | 3 | <i>Larix gmelinii.</i>                  | Moderate | Lower | Shady | 1.485  | 1.8932  |
| 11 | 1 | 1 | 4 | <i>Larix gmelinii.</i>                  | Moderate | Lower | Shady | 1.395  | 1.0251  |
| 11 | 1 | 2 | 1 | <i>Larix gmelinii.</i>                  | Moderate | Lower | Shady | 0.417  | 9.0868  |
| 11 | 1 | 2 | 2 | <i>Larix gmelinii.</i>                  | Moderate | Lower | Shady | 0.8986 | 4.0628  |
| 11 | 1 | 2 | 3 | <i>Larix gmelinii.</i>                  | Moderate | Lower | Shady | 1.425  | 1.5501  |
| 11 | 1 | 2 | 4 | <i>Larix gmelinii.</i>                  | Moderate | Lower | Shady | 1.596  | 0.8654  |
| 11 | 1 | 3 | 1 | <i>Larix gmelinii.</i>                  | Moderate | Lower | Shady | 1.019  | 0.9573  |
| 11 | 1 | 3 | 2 | <i>Larix gmelinii.</i>                  | Moderate | Lower | Shady | 1.227  | 0.9296  |
| 11 | 1 | 3 | 3 | <i>Larix gmelinii.</i>                  | Moderate | Lower | Shady | 1.641  | 0.9297  |
| 11 | 1 | 3 | 4 | <i>Larix gmelinii.</i>                  | Moderate | Lower | Shady | 1.694  | 0.8313  |
| 11 | 2 | 1 | 1 | <i>Larix gmelinii.</i>                  | Moderate | Lower | Shady | 0.804  | 2.2069  |
| 11 | 2 | 1 | 2 | <i>Larix gmelinii.</i>                  | Moderate | Lower | Shady | 1.134  | 1.2318  |
| 11 | 2 | 1 | 3 | <i>Larix gmelinii.</i>                  | Moderate | Lower | Shady | 1.465  | 0.8023  |
| 11 | 2 | 1 | 4 | <i>Larix gmelinii.</i>                  | Moderate | Lower | Shady | 1.309  | 0.7325  |
| 11 | 2 | 2 | 1 | <i>Larix gmelinii.</i>                  | Moderate | Lower | Shady | 0.248  | 2.5644  |
| 11 | 2 | 2 | 2 | <i>Larix gmelinii.</i>                  | Moderate | Lower | Shady | 1.149  | 1.4226  |
| 11 | 2 | 2 | 3 | <i>Larix gmelinii.</i>                  | Moderate | Lower | Shady | 1.462  | 0.9206  |
| 11 | 2 | 2 | 4 | <i>Larix gmelinii.</i>                  | Moderate | Lower | Shady | 1.328  | 1.0648  |
| 11 | 2 | 3 | 1 | <i>Larix gmelinii.</i>                  | Moderate | Lower | Shady | 1.144  | 0.8684  |

|    |   |   |   |                                         |          |       |       |       |         |
|----|---|---|---|-----------------------------------------|----------|-------|-------|-------|---------|
| 11 | 2 | 3 | 2 | <i>Larix gmelinii.</i>                  | Moderate | Lower | Shady | 1.32  | 0.6541  |
| 11 | 2 | 3 | 3 | <i>Larix gmelinii.</i>                  | Moderate | Lower | Shady | 1.405 | 0.9440  |
| 11 | 2 | 3 | 4 | <i>Larix gmelinii.</i>                  | Moderate | Lower | Shady | 1.496 | 1.4952  |
| 11 | 3 | 1 | 1 | <i>Larix gmelinii.</i>                  | Moderate | Lower | Shady | 0.801 | 2.0607  |
| 11 | 3 | 1 | 2 | <i>Larix gmelinii.</i>                  | Moderate | Lower | Shady | 1.207 | 1.7020  |
| 11 | 3 | 1 | 3 | <i>Larix gmelinii.</i>                  | Moderate | Lower | Shady | 1.115 | 2.3144  |
| 11 | 3 | 1 | 4 | <i>Larix gmelinii.</i>                  | Moderate | Lower | Shady | 1.204 | 1.1452  |
| 11 | 3 | 2 | 1 | <i>Larix gmelinii.</i>                  | Moderate | Lower | Shady | 0.369 | 36.9096 |
| 11 | 3 | 2 | 2 | <i>Larix gmelinii.</i>                  | Moderate | Lower | Shady | 0.863 | 3.0102  |
| 11 | 3 | 2 | 3 | <i>Larix gmelinii.</i>                  | Moderate | Lower | Shady | 1.051 | 2.3018  |
| 11 | 3 | 2 | 4 | <i>Larix gmelinii.</i>                  | Moderate | Lower | Shady | 1.301 | 0.6737  |
| 11 | 3 | 3 | 1 | <i>Larix gmelinii.</i>                  | Moderate | Lower | Shady | 0.827 | 6.0959  |
| 11 | 3 | 3 | 2 | <i>Larix gmelinii.</i>                  | Moderate | Lower | Shady | 0.94  | 1.0942  |
| 11 | 3 | 3 | 3 | <i>Larix gmelinii.</i>                  | Moderate | Lower | Shady | 1.3   | 0.6838  |
| 11 | 3 | 3 | 4 | <i>Larix gmelinii.</i>                  | Moderate | Lower | Shady | 1.301 | 0.7634  |
| 12 | 1 | 1 | 1 | <i>Pinus sylvestris var. mongolica.</i> | Low      | Upper | Shady | 1.132 | 0.5828  |
| 12 | 1 | 1 | 2 | <i>Pinus sylvestris var. mongolica.</i> | Low      | Upper | Shady | 1.348 | 0.5021  |
| 12 | 1 | 1 | 3 | <i>Pinus sylvestris var. mongolica.</i> | Low      | Upper | Shady | 1.428 | 0.5532  |
| 12 | 1 | 1 | 4 | <i>Pinus sylvestris var. mongolica.</i> | Low      | Upper | Shady | 1.335 | 0.5358  |
| 12 | 1 | 2 | 1 | <i>Pinus sylvestris var. mongolica.</i> | Low      | Upper | Shady | 1.01  | 0.4468  |
| 12 | 1 | 2 | 2 | <i>Pinus sylvestris var. mongolica.</i> | Low      | Upper | Shady | 1.164 | 0.4675  |
| 12 | 1 | 2 | 3 | <i>Pinus sylvestris var. mongolica.</i> | Low      | Upper | Shady | 1.408 | 0.6644  |
| 12 | 1 | 3 | 1 | <i>Pinus sylvestris var. mongolica.</i> | Low      | Upper | Shady | 0.947 | 0.5886  |
| 12 | 1 | 3 | 2 | <i>Pinus sylvestris var. mongolica.</i> | Low      | Upper | Shady | 1.169 | 0.5926  |
| 12 | 1 | 3 | 3 | <i>Pinus sylvestris var. mongolica.</i> | Low      | Upper | Shady | 1.263 | 0.4124  |
| 12 | 1 | 3 | 4 | <i>Pinus sylvestris var. mongolica.</i> | Low      | Upper | Shady | 1.32  | 0.0272  |
| 12 | 2 | 1 | 1 | <i>Pinus sylvestris var. mongolica.</i> | Low      | Upper | Shady | 0.996 | 1.6494  |
| 12 | 2 | 1 | 2 | <i>Pinus sylvestris var. mongolica.</i> | Low      | Upper | Shady | 1.211 | 0.4319  |
| 12 | 2 | 1 | 3 | <i>Pinus sylvestris var. mongolica.</i> | Low      | Upper | Shady | 1.222 | 0.3198  |
| 12 | 2 | 1 | 4 | <i>Pinus sylvestris var. mongolica.</i> | Low      | Upper | Shady | 1.486 | 0.7133  |
| 12 | 2 | 2 | 1 | <i>Pinus sylvestris var. mongolica.</i> | Low      | Upper | Shady | 0.899 | 5.3500  |
| 12 | 2 | 2 | 2 | <i>Pinus sylvestris var. mongolica.</i> | Low      | Upper | Shady | 1.304 | 2.4300  |
| 12 | 2 | 2 | 3 | <i>Pinus sylvestris var. mongolica.</i> | Low      | Upper | Shady | 1.24  | 0.8504  |
| 12 | 2 | 2 | 4 | <i>Pinus sylvestris var. mongolica.</i> | Low      | Upper | Shady | 1.122 | 0.6469  |
| 12 | 2 | 3 | 1 | <i>Pinus sylvestris var. mongolica.</i> | Low      | Upper | Shady | 1.1   | 0.6272  |
| 12 | 2 | 3 | 2 | <i>Pinus sylvestris var. mongolica.</i> | Low      | Upper | Shady | 1.244 | 1.6808  |
| 12 | 2 | 3 | 3 | <i>Pinus sylvestris var. mongolica.</i> | Low      | Upper | Shady | 1.373 | 1.4758  |
| 12 | 2 | 3 | 4 | <i>Pinus sylvestris var. mongolica.</i> | Low      | Upper | Shady | 1.316 | 1.3977  |
| 12 | 3 | 1 | 1 | <i>Pinus sylvestris var. mongolica.</i> | Low      | Upper | Shady | 0.932 | 0.8186  |
| 12 | 3 | 1 | 2 | <i>Pinus sylvestris var. mongolica.</i> | Low      | Upper | Shady | 1.114 | 0.7923  |
| 12 | 3 | 1 | 3 | <i>Pinus sylvestris var. mongolica.</i> | Low      | Upper | Shady | 1.259 | 0.8527  |
| 12 | 3 | 1 | 4 | <i>Pinus sylvestris var. mongolica.</i> | Low      | Upper | Shady | 1.526 | 0.5503  |
| 12 | 3 | 2 | 1 | <i>Pinus sylvestris var. mongolica.</i> | Low      | Upper | Shady | 1.008 | 0.7747  |
| 12 | 3 | 2 | 2 | <i>Pinus sylvestris var. mongolica.</i> | Low      | Upper | Shady | 1.023 | 0.9912  |

|    |   |   |   |                                         |     |        |       |       |        |
|----|---|---|---|-----------------------------------------|-----|--------|-------|-------|--------|
| 12 | 3 | 2 | 3 | <i>Pinus sylvestris var. mongolica.</i> | Low | Upper  | Shady | 1.229 | 0.6260 |
| 12 | 3 | 2 | 4 | <i>Pinus sylvestris var. mongolica.</i> | Low | Upper  | Shady | 1.457 | 0.7354 |
| 12 | 3 | 3 | 1 | <i>Pinus sylvestris var. mongolica.</i> | Low | Upper  | Shady | 0.842 | 1.1933 |
| 12 | 3 | 3 | 2 | <i>Pinus sylvestris var. mongolica.</i> | Low | Upper  | Shady | 1.17  | 0.9950 |
| 13 | 1 | 1 | 1 | <i>Pinus sylvestris var. mongolica.</i> | Low | Middle | Shady | 0.825 | 2.5327 |
| 13 | 1 | 1 | 2 | <i>Pinus sylvestris var. mongolica.</i> | Low | Middle | Shady | 1.044 | 1.8006 |
| 13 | 1 | 1 | 3 | <i>Pinus sylvestris var. mongolica.</i> | Low | Middle | Shady | 1.267 | 1.4082 |
| 13 | 1 | 1 | 4 | <i>Pinus sylvestris var. mongolica.</i> | Low | Middle | Shady | 1.35  | 1.5117 |
| 13 | 1 | 2 | 1 | <i>Pinus sylvestris var. mongolica.</i> | Low | Middle | Shady | 1.213 | 1.2913 |
| 13 | 1 | 2 | 2 | <i>Pinus sylvestris var. mongolica.</i> | Low | Middle | Shady | 1.283 | 1.2806 |
| 13 | 1 | 2 | 3 | <i>Pinus sylvestris var. mongolica.</i> | Low | Middle | Shady | 1.293 | 0.8881 |
| 13 | 1 | 2 | 4 | <i>Pinus sylvestris var. mongolica.</i> | Low | Middle | Shady | 1.541 | 0.6896 |
| 13 | 1 | 3 | 1 | <i>Pinus sylvestris var. mongolica.</i> | Low | Middle | Shady | 1.092 | 1.4264 |
| 13 | 1 | 3 | 2 | <i>Pinus sylvestris var. mongolica.</i> | Low | Middle | Shady | 1.127 | 1.3887 |
| 13 | 1 | 3 | 3 | <i>Pinus sylvestris var. mongolica.</i> | Low | Middle | Shady | 1.033 | 5.9589 |
| 13 | 1 | 3 | 4 | <i>Pinus sylvestris var. mongolica.</i> | Low | Middle | Shady | 1.448 | 0.7306 |
| 13 | 2 | 1 | 1 | <i>Pinus sylvestris var. mongolica.</i> | Low | Middle | Shady | 1.224 | 0.8068 |
| 13 | 2 | 1 | 2 | <i>Pinus sylvestris var. mongolica.</i> | Low | Middle | Shady | 0.952 | 0.8073 |
| 13 | 2 | 1 | 3 | <i>Pinus sylvestris var. mongolica.</i> | Low | Middle | Shady | 1.312 | 0.8657 |
| 13 | 2 | 1 | 4 | <i>Pinus sylvestris var. mongolica.</i> | Low | Middle | Shady | 1.356 | 0.7173 |
| 13 | 2 | 2 | 1 | <i>Pinus sylvestris var. mongolica.</i> | Low | Middle | Shady | 1.023 | 0.6925 |
| 13 | 2 | 2 | 2 | <i>Pinus sylvestris var. mongolica.</i> | Low | Middle | Shady | 1.309 | 0.8104 |
| 13 | 2 | 2 | 3 | <i>Pinus sylvestris var. mongolica.</i> | Low | Middle | Shady | 1.268 | 0.6557 |
| 13 | 2 | 2 | 4 | <i>Pinus sylvestris var. mongolica.</i> | Low | Middle | Shady | 1.43  | 0.7122 |
| 13 | 2 | 3 | 1 | <i>Pinus sylvestris var. mongolica.</i> | Low | Middle | Shady | 0.963 | 0.9659 |
| 13 | 2 | 3 | 2 | <i>Pinus sylvestris var. mongolica.</i> | Low | Middle | Shady | 1.282 | 0.7840 |
| 13 | 2 | 3 | 3 | <i>Pinus sylvestris var. mongolica.</i> | Low | Middle | Shady | 1.387 | 0.7581 |
| 13 | 2 | 3 | 4 | <i>Pinus sylvestris var. mongolica.</i> | Low | Middle | Shady | 1.401 | 0.6370 |
| 13 | 3 | 1 | 1 | <i>Pinus sylvestris var. mongolica.</i> | Low | Middle | Shady | 0.826 | 0.8470 |
| 13 | 3 | 1 | 2 | <i>Pinus sylvestris var. mongolica.</i> | Low | Middle | Shady | 1.239 | 1.9897 |
| 13 | 3 | 1 | 3 | <i>Pinus sylvestris var. mongolica.</i> | Low | Middle | Shady | 1.657 | 1.2663 |
| 13 | 3 | 1 | 4 | <i>Pinus sylvestris var. mongolica.</i> | Low | Middle | Shady | 1.263 | 1.1224 |
| 13 | 3 | 2 | 1 | <i>Pinus sylvestris var. mongolica.</i> | Low | Middle | Shady | 1.01  | 1.8632 |
| 13 | 3 | 2 | 2 | <i>Pinus sylvestris var. mongolica.</i> | Low | Middle | Shady | 1.098 | 1.1488 |
| 13 | 3 | 2 | 3 | <i>Pinus sylvestris var. mongolica.</i> | Low | Middle | Shady | 1.455 | 1.1374 |
| 13 | 3 | 2 | 4 | <i>Pinus sylvestris var. mongolica.</i> | Low | Middle | Shady | 1.23  | 0.8419 |
| 13 | 3 | 3 | 1 | <i>Pinus sylvestris var. mongolica.</i> | Low | Middle | Shady | 1.082 | 1.3260 |
| 13 | 3 | 3 | 2 | <i>Pinus sylvestris var. mongolica.</i> | Low | Middle | Shady | 1.137 | 1.3003 |
| 13 | 3 | 3 | 3 | <i>Pinus sylvestris var. mongolica.</i> | Low | Middle | Shady | 1.332 | 0.9650 |
| 13 | 3 | 3 | 4 | <i>Pinus sylvestris var. mongolica.</i> | Low | Middle | Shady | 1.434 | 0.8356 |
| 14 | 1 | 1 | 1 | <i>Pinus sylvestris var. mongolica.</i> | Low | Lower  | Shady | 0.944 | 1.0882 |
| 14 | 1 | 1 | 2 | <i>Pinus sylvestris var. mongolica.</i> | Low | Lower  | Shady | 1.077 | 0.8537 |
| 14 | 1 | 1 | 3 | <i>Pinus sylvestris var. mongolica.</i> | Low | Lower  | Shady | 1.645 | 0.6268 |
| 14 | 1 | 1 | 4 | <i>Pinus sylvestris var. mongolica.</i> | Low | Lower  | Shady | 1.354 | 0.8583 |

---

|    |   |   |   |                                         |     |       |       |       |        |
|----|---|---|---|-----------------------------------------|-----|-------|-------|-------|--------|
| 14 | 1 | 2 | 1 | <i>Pinus sylvestris var. mongolica.</i> | Low | Lower | Shady | 0.895 | 1.0909 |
| 14 | 1 | 2 | 2 | <i>Pinus sylvestris var. mongolica.</i> | Low | Lower | Shady | 1.018 | 0.7679 |
| 14 | 1 | 2 | 3 | <i>Pinus sylvestris var. mongolica.</i> | Low | Lower | Shady | 1.419 | 0.6779 |
| 14 | 1 | 2 | 4 | <i>Pinus sylvestris var. mongolica.</i> | Low | Lower | Shady | 1.494 | 0.6776 |
| 14 | 1 | 3 | 1 | <i>Pinus sylvestris var. mongolica.</i> | Low | Lower | Shady | 0.648 | 2.6597 |
| 14 | 1 | 3 | 2 | <i>Pinus sylvestris var. mongolica.</i> | Low | Lower | Shady | 1.151 | 1.9423 |
| 14 | 1 | 3 | 3 | <i>Pinus sylvestris var. mongolica.</i> | Low | Lower | Shady | 1.35  | 1.3898 |
| 14 | 1 | 3 | 4 | <i>Pinus sylvestris var. mongolica.</i> | Low | Lower | Shady | 1.302 | 1.0446 |
| 14 | 2 | 1 | 1 | <i>Pinus sylvestris var. mongolica.</i> | Low | Lower | Shady | 0.834 | 1.4974 |
| 14 | 2 | 1 | 2 | <i>Pinus sylvestris var. mongolica.</i> | Low | Lower | Shady | 1.069 | 1.4574 |
| 14 | 2 | 1 | 3 | <i>Pinus sylvestris var. mongolica.</i> | Low | Lower | Shady | 1.135 | 1.1159 |
| 14 | 2 | 1 | 4 | <i>Pinus sylvestris var. mongolica.</i> | Low | Lower | Shady | 1.515 | 0.8269 |
| 14 | 2 | 2 | 1 | <i>Pinus sylvestris var. mongolica.</i> | Low | Lower | Shady | 0.973 | 1.8208 |
| 14 | 2 | 2 | 2 | <i>Pinus sylvestris var. mongolica.</i> | Low | Lower | Shady | 1.097 | 1.3279 |
| 14 | 2 | 2 | 3 | <i>Pinus sylvestris var. mongolica.</i> | Low | Lower | Shady | 1.341 | 0.9679 |
| 14 | 2 | 2 | 4 | <i>Pinus sylvestris var. mongolica.</i> | Low | Lower | Shady | 1.262 | 1.0875 |
| 14 | 2 | 3 | 1 | <i>Pinus sylvestris var. mongolica.</i> | Low | Lower | Shady | 1.097 | 1.5115 |
| 14 | 2 | 3 | 2 | <i>Pinus sylvestris var. mongolica.</i> | Low | Lower | Shady | 1.28  | 0.9848 |
| 14 | 2 | 3 | 3 | <i>Pinus sylvestris var. mongolica.</i> | Low | Lower | Shady | 1.493 | 0.6298 |
| 14 | 2 | 3 | 4 | <i>Pinus sylvestris var. mongolica.</i> | Low | Lower | Shady | 1.315 | 0.8254 |
| 14 | 3 | 1 | 1 | <i>Pinus sylvestris var. mongolica.</i> | Low | Lower | Shady | 1.125 | 1.3358 |
| 14 | 3 | 1 | 2 | <i>Pinus sylvestris var. mongolica.</i> | Low | Lower | Shady | 1.1   | 1.3969 |
| 14 | 3 | 1 | 3 | <i>Pinus sylvestris var. mongolica.</i> | Low | Lower | Shady | 1.307 | 0.7408 |
| 14 | 3 | 1 | 4 | <i>Pinus sylvestris var. mongolica.</i> | Low | Lower | Shady | 1.439 | 1.0308 |
| 14 | 3 | 2 | 1 | <i>Pinus sylvestris var. mongolica.</i> | Low | Lower | Shady | 0.83  | 1.3989 |
| 14 | 3 | 2 | 2 | <i>Pinus sylvestris var. mongolica.</i> | Low | Lower | Shady | 1.179 | 1.4988 |
| 14 | 3 | 2 | 3 | <i>Pinus sylvestris var. mongolica.</i> | Low | Lower | Shady | 1.192 | 1.0771 |
| 14 | 3 | 2 | 4 | <i>Pinus sylvestris var. mongolica.</i> | Low | Lower | Shady | 1.259 | 1.0004 |
| 14 | 3 | 3 | 1 | <i>Pinus sylvestris var. mongolica.</i> | Low | Lower | Shady | 0.973 | 1.1144 |
| 14 | 3 | 3 | 2 | <i>Pinus sylvestris var. mongolica.</i> | Low | Lower | Shady | 0.975 | 1.2032 |
| 14 | 3 | 3 | 3 | <i>Pinus sylvestris var. mongolica.</i> | Low | Lower | Shady | 1.13  | 1.0078 |
| 14 | 3 | 3 | 4 | <i>Pinus sylvestris var. mongolica.</i> | Low | Lower | Shady | 1.389 | 0.9049 |

---
